# Supplementary material
Source: PubMed Central journal article supplement (PMC3252797)
Supplement: pr200845n_si_001.pdf [file pr200845n_si_001.pdf]

## Supporting Information

### Material and Methods:

The plasma membrane of transformed protoplasts was visualized with the membrane selective amphiphilic styryl dye FM4-64 by adding a 2000x stock solution (aqueous 16.4 mM SynaptoRed C2, Biotium, Germany) to the sterile protoplast incubation media (Gamborg's B5 basal salts, 0.34 M glucose, 0.34 M mannitol, pH 5.5) 30 min before observation with the confocal laser scanning microscope (CLSM) (TCS-SP2 Leica, Germany). Excitation wavelengths were 488 nm (argon laser) for GFP and FM4-64. Emissions were detected between 500-535 nm for GFP and 610-680 nm for FM4-64. Images were taken with a long distance 63x water-immersion objective. Pictures were prepared for publication with the Leica LAS AF Lite, ImageJ and Paint Shop Pro 5 software.

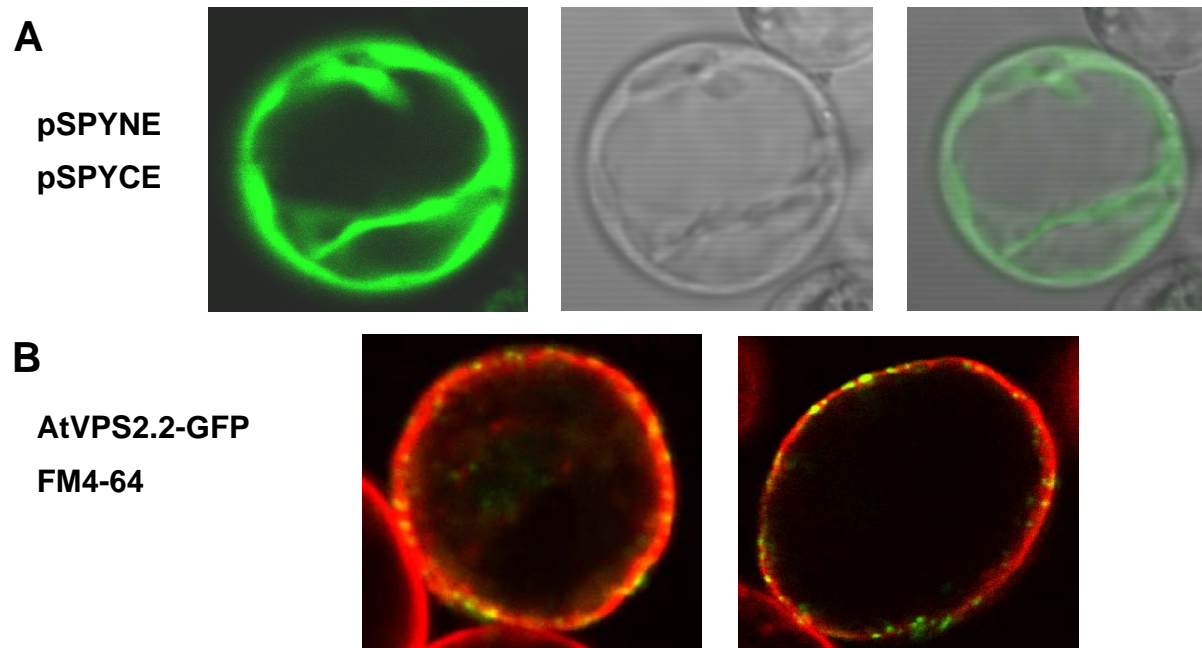

### Supplemental Figure S1. Single scans through transformed protoplasts

**A)** Protoplast transformed with the empty BiFC vectors pSPYNE and pSPYCE which occasionally and spontaneously interact in the cytoplasm. The left image shows the GFP emission, in the middle is the transmission image of the same protoplast and on the right the overlay between the GFP and transmission image. **B)** Protoplasts transformed with AtVPS2.2-GFP and stained with FM4-64. The orange-yellow speckles are AtVPS2.2-GFP labelled compartments that co-localized with the plasma membrane.





**Supplemental Table S2 Overview of the primer pairs used for cloning of the AtVPS2.2-GFP construct and the Y2H and BiFC interaction analyses.**

| <b>Primer name</b>     | <b>Primer sequence</b>                   |
|------------------------|------------------------------------------|
| 5g44560-5Bam           | 5`-AAGGATCCAAAGTGCTAGCCATCTAC            |
| 5g44560-3Bam           | 5`-CTGGATCCACGTATTGTGTTTGCATGAC          |
| 5g44560_GFP_Sacl-pm    | 5`-TAGTTGAGCTCCGTTCTGTAATATTCG           |
| 5g44560_GFP_NcoI_R     | 5`-TATTCCATG GATCGTCGTAGCGAAGCCA         |
| At5g44560_Y2HR         | 5`-CAGGATCCTCAGATTTCGTCTAGCGA            |
| At5g44560_Y2HF         | 5`-CAGAATTCATGAACATTTTCGAGAAGAAG         |
| At5g22950_Y2HR         | 5`-GAGGATCCTTAGGATCTAACTTTAGCGAG         |
| At5g22950_Y2HF         | 5`-CACATATGGAGAGAGTGATGAACATC            |
| At2g06530_Y2HR         | 5`-GACCCGGGTCACATTTTTCTAAGGTTATCC        |
| At2g06530_Y2HF         | 5`-GACATATGATGAATTCAATCTTCGGAA           |
| At1g03950_Y2HR         | 5`-TCGAATTCCTATCTAAGCGCCGCCAA            |
| At1g03950_Y2HF         | 5`-CAGAATTCATGAACATCTTCACTAAGAAAC        |
| At1g17730_Y2HR         | 5`-CTGGATCCTTAACCTCTGGCTTTAAGCT          |
| At1g17330_Y2HF         | 5`-TCGAATTCATGGGTAATACAGATAAGCTG         |
| At1g73030_Y2HR         | 5`-TAGGATCCTTATCCTCTGGCTTTAAGCT          |
| At1g73030_Y2HF         | 5`-GAGAATTCATGGGTAACACAGATAAGC           |
| At3g45000_Y2HR         | 5`-GAGGATCCCTATGATCTAACATTGGCTAG         |
| At3g45000_Y2HF         | 5`-CTCATATGACTATTAAGTTTGCCTTCAG          |
| At5g09260_Y2HR         | 5`-CACCCGGGTTCAAGCTTCAAAGGTTCTTC         |
| At5g09260_Y2HF         | 5`-GACATATGGGGAATTTATTCGTGAAG            |
| At3g10640_Y2HR         | 5`-CTGGATCCTTAACCCCGGAGAGAAGCT           |
| At3g10640_Y2HF         | 5`-TAGAATTCATGAGGAGAGTTTTCGGCGCGA        |
| At5g63880_Y2HR         | 5`-CTGGATCCTCAAGCCGGCAAACCTTC            |
| At5g63880_Y2HF         | 5`-CAGAATTCATGGGGAATTTGTCGTGAAG          |
| At4g29160_Y2HR         | 5`-TAGGATCCTTAGAGGGCCATCTC               |
| At4g29160_Y2HF         | 5`-TAGAATTCATGATGAATCGGCTATTCGA          |
| At2g19830_Y2HR         | 5`-GAGGATCCTTAGAGAGCCATCTCAGCT           |
| At2g19830_Y2HF         | 5`-CTCATATGTTTATGAATCGGCTATTCGGGA        |
| At5g04850_Y2HR         | 5`-CAGGATCCTTAGCCCCGAAGTGATGCA           |
| At5g04850_Y2HF         | 5`-CAGAATTCATGAAGAGAATCTTTGGAGCGA        |
| 5g44560_BamHI_15_start | 5`-CGCCACTAGTGGATCCATGAACATTTTCGAGAAG    |
| 5g44560_XmaI_15_end    | 5`-ATGGGTACATCCCGGGGATTCGTCTAGCGAAGC     |
| 1g73030_BamHI_15_start | 5`-CGCCACTAGTGGATCCATGGGTAACACAGATAAGC   |
| 1g73030_XmaI_15_end    | 5`-ATGGGTACATCCCGGGTCTCTGGCTTTAAGCTC     |
| 1g17730_BamHI_15_start | 5`-CGCCACTAGTGGATCCATGGGTAATACAGATAAGCTG |
| 1g17730_XmaI_15_end    | 5`-ATGGGTACATCCCGGGACCTCTGGCTTTAAGCTCG   |
| 4g29160_BamHI_15_start | 5`-CGCCACTAGTGGATCCATGATGAATCGGCTATTC    |
| 4g29160_Sall_15_end    | 5`-TACCCTCGAGGTCGACGAGGGCGATCTCAGCCT     |
